# Supplementary material for: Insights into the mechanism of the enhanced visible-light photocatalytic activity of a MoS2/BiOI heterostructure with interfacial coupling
Source: Royal Society of Chemistry journal article supplement (doi:10.1039/d0cp03241g), 2020-01-01
Supplement: d0cp03241g1.pdf [file d0cp03241g1.pdf]

## Supplementary Information (SI)

### Insights into the mechanism of the enhanced visible-light photocatalytic activity of MoS<sub>2</sub>/BiOI heterostructure under interfacial coupling

Jisong Hu,<sup>a</sup> Jie Liu,<sup>a</sup> Zhangze Chen,<sup>a</sup> Xinguo Ma,<sup>\*a</sup> Yang Liu,<sup>\*b</sup> Shiqi Wang,<sup>a</sup> Zhifeng Liu,<sup>a</sup> Chuyun Huang<sup>\*c</sup>

<sup>a</sup> School of Science, Hubei University of Technology, Wuhan 430068, China. E-mail: maxg2013@sohu.com

<sup>c</sup> Key Laboratory of River Regulation and Flood Control of MWR, Wuhan, 430010, China. E-mail: fxfans@163.com

<sup>b</sup> Hubei Engineering Technology Research Center of Energy Photoelectric Device and System, Hubei University of Technology, Wuhan 430068, China

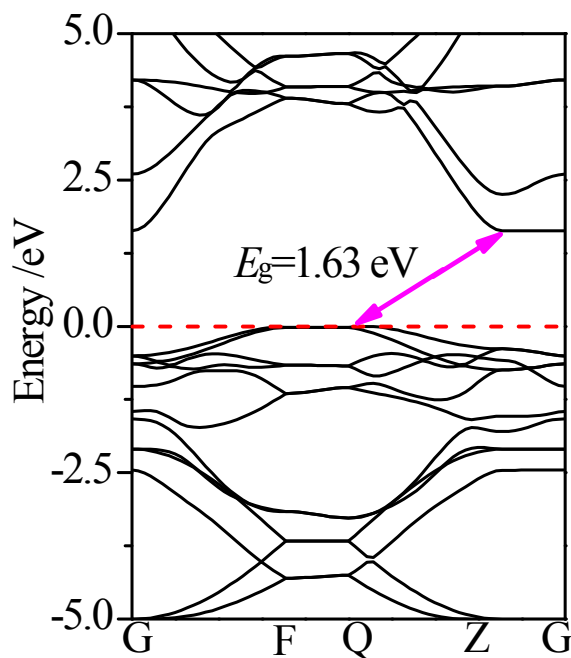

**Figure S1.** Energy band structure of bulk BiOI using PBE method.

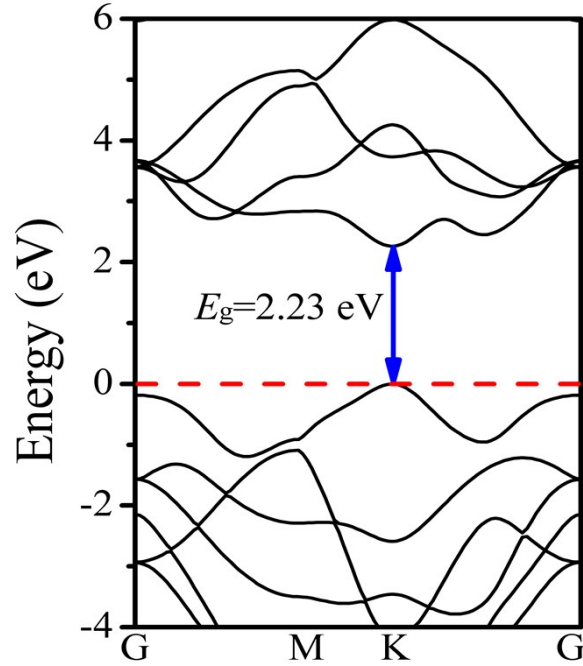

**Figure S2.** Energy band structure of monolayer MoS<sub>2</sub> using hybrid functional HSE06.

The state-of-the-art hybrid DFT approach based on the Heyd-Scuseria-Ernzerhof functional (HSE06) was used to calculate the electronic structures of MoS<sub>2</sub> after geometric optimization. In the default hybrid functional HSE06, the screening parameter  $\mu$  and the mixing parameter  $\alpha$  are set as  $0.21 \text{ \AA}^{-1}$  and 0.25, respectively. And norm-conserving pseudopotentials were used for all-electron HSE06 calculations. The calculated band gap of monolayer MoS<sub>2</sub> is 2.23 eV at the high symmetry K point, which is larger than the experimental band gap of about 1.9 eV.<sup>1,2</sup>

[1] K. F. Mak, C. Lee, J. Hone, J. Shan and T. F. Heinz, Phys. Rev. Lett., 2010, 105, 136805.

[2] G. Eda, H. Yamaguchi, D. Voiry, T. Fujita, M. Chen and M. Chhowalla, Nano Lett., 2011, 11, 5111–5116.
